# Supplementary material
Source: publisher site journal article supplement (https://www.dovepress.com/article/supplementary_file/596147/596147%20Revised%20supplementary_1.docx)
Supplement: Supplementary file 1 [file 596147%20Revised%20supplementary_1.docx]

**TABLES**

**Supplementary material 1**

**Table S1. Characteristics of participants N-55**

| **Characteristic** | **n (%)** |
| --- | --- |
| Age groups | |
| <35 | 1(1.82) |
| 36-45 | 2(3.63) |
| 46-55 | 17(30.91) |
| 56-65 | 14(25.45) |
| 66-75 | 14(25.45) |
| 76-85 | 6(10.91) |
| >85 | 1(1.82) |
| Female | 24(43.64) |
| Male | 31(56.36) |
| African | 37(67.27) |
| Caucasian | 9(16.36) |
| Asian | 5(9.09) |
| Coloured* | 4(7.27) |
| T1DM** | 13(23.63) |
| T2DM*** | 42(76.36) |
| HbA1c (%) **** | |
| ≤7.7 | 33(60) |
| >7.7 | 22(40) |

*Coloured = participants of mixed race, **T1DM = type 1 diabetes

mellitus,***T2DM = type 2 diabetes, ****HbA1c = glycated haemoglobin

**Supplementary material 2**

**Table S2. Linear Regression Coefficients at 3 Months and 6 Months**

| **Treatment Interval** | **Unstandardized Coefficients** | | **Standardized Coefficients** | **t** | **Sig.** | **95.0% Confidence Interval for B** | |
| --- | --- | --- | --- | --- | --- | --- | --- |
| **B** | **Std. Error** | **Beta** | **Lower Bound** | **Upper Bound** |
| (Constant)  MONTH 3 CFT  MONTH 3 SPFT  MONTH 3 IPFT  MONTH 3 NPFT  MONTH 3 TPFT | -.497 | .237 |  | -2.102 | .041 | -.973 | -.022 |
| .003 | .001 | .661 | 4.334 | <.001 | .001 | .004 |
| .000 | .001 | .086 | .439 | .663 | -.002 | .003 |
| .000 | .001 | .078 | .434 | .666 | -.002 | .003 |
| .002 | .002 | .245 | 1.067 | .291 | -.001 | .005 |
| -.002 | .001 | -.354 | -1.766 | .084 | -.004 | .000 |
| (Constant)  MONTH 6 CFT  MONTH 6 SPFT  MONTH 6 IPFT  MONTH 6 NPFT | -.471 | .190 |  | -2.476 | .017 | -.853 | -.089 |
| .001 | .001 | .405 | 2.291 | .026 | .000 | .003 |
| -.001 | .001 | -.227 | -1.324 | .192 | -.003 | .001 |
| .001 | .001 | .230 | 1.211 | .232 | -.001 | .003 |
| .002 | .001 | .437 | 2.309 | .025 | .000 | .004 |
| MONTH 6 TPFT | .000 | .001 | -.053 | -.213 | .832 | -.003 | .002 |

**FIGURES**

**Supplementary material 1**


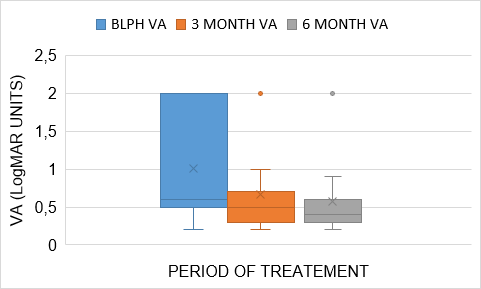


**Figure S1. Effect of Avastin on visual acuity at baseline, 3 and 6 months**

LogMAR =logarithmic minimum angle of resolution; VA = visual acuity; BLPH VA = Baseline pinhole visual acuity

**Supplementary material 2**


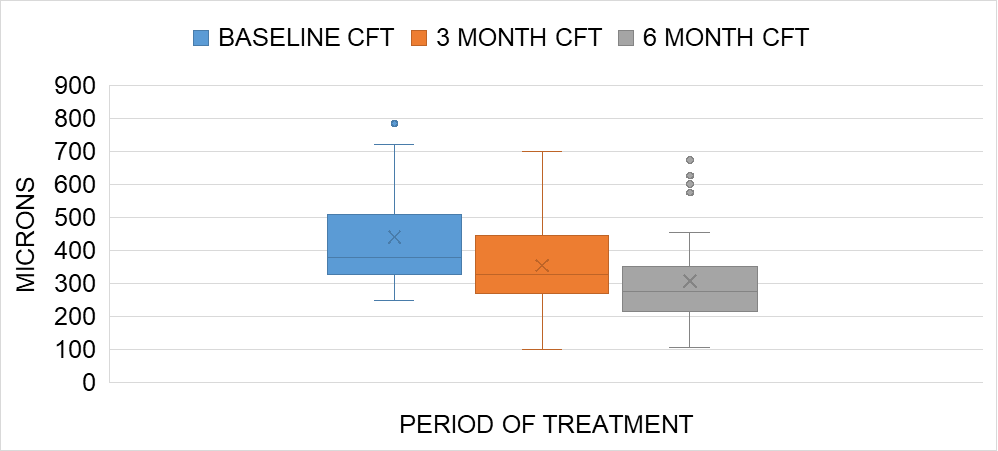


**Figure S2. Effect of Avastin in improving the central foveal thickness from baseline to 3 and 6 months**

CFT = central foveal thickness; BL = baseline measurement

**Supplementary material 3**


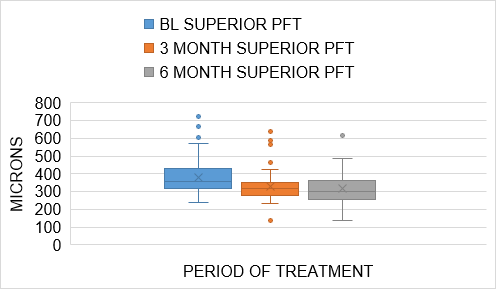


**Figure S3. Effect of Avastin in reducing the superior parafoveal thickness from baseline to 3 and 6 months**

PFT = parafoveal thickness; BL = baseline measurement
